# Supplementary material
Source: publisher site journal article supplement (https://www.dovepress.com/article/217036)
Supplement: Supplementary file 1 [file get_supplementary_file.php]

**Supplement Table 1. pain- and mental disorders-related brain regions**

|  | Pain-related  brain regions | Depression-related  brain regions | Anxiety disorder-related brain regions | Schizophrenia-related  brain regions |
| --- | --- | --- | --- | --- |
| **PFC** | PFC DLPFC | PFC DLPFC  OFC mPFC | PFC DLPFC  OFC mPFC | PFC DLPFC  OFC mPFC |
| **Frontal** | Motor cortex  Frontal lobe | Frontal lobe  MFG | Frontal lobe | Frontal lobe  MFG  IFG |
| **Parietal** | Somatosensory area | Precuneus | - | Parietal lobe  Precuneus |
| **Temporal** |  | Temporal lobe | Temporal lobe | Temporal lobe  STG  MTL |
| **Limbic** | ACC  Insula  Amygdala  Hippocampus  Anterior insula  Central amygdaloid nucleus  Posterior insula | ACC  PCC  Insula  Amygdala  Hippocampus  Dentate gyrus | ACC  Insula  Amygdala  Hippocampus | ACC  PCC  Insula  Amygdala  Hippocampus  PHG |
| **DIEN** | Thalamus  Hypothalamus | Thalamus  Hypothalamus  Diencephalon | Thalamus  Hypothalamus | Thalamus  Diencephalon |
| **BG** | Striatum  Nac | Basal ganglia  Striatum  Putamen Nac | Basal ganglia  Striatum  Putamen Caudate nucleus | Basal ganglia  Striatum  Putamen Caudate nucleus  Nac  Globus pallidus |
| **BS** | Brain stem  PAG  Medulla oblongata  Midbrain  LC | Brain stem  Midbrain  Raphe nuclei  LC | - | Midbrain |
| **Cerebellum** | Cerebellum | Cerebellum | - | Cerebellum |
| **Corpus** | - | - | - | Corpus Callosum |

Abbreviations are as follows: PFC, Prefrontal cortex; DLPFC, Dorsolateral prefrontal cortex; OFC, Orbitofrontal cortex; mPFC, medial prefrontal cortex; MFG, Medial frontal gyrus; IFG, Inferior frontal gyrus; STG, Superior temporal gyrus; MTL, Medial temporal lobe; ACC, Anterior cingulate cortex; PCC, Posterior cingulate cortex; PHG, Parahippocampal gyrus; Nac, Nucleus accumbens; LC, Locus coeruleus.
